# Supplementary material for: Design, synthesis, and biological evaluation of novel imidazole–morpholinone hybrids as broad-spectrum antimicrobial agents: molecular docking, DFT, and ADMET studies
Source: Royal Society of Chemistry journal article supplement (doi:10.1039/d6ra03352k), 2026-06-01
Supplement: d6ra03352k1.pdf [file d6ra03352k1.pdf]

## Design, Synthesis, and Biological Evaluation of Novel Imidazole–Morpholinone Hybrids as Broad-Spectrum Antimicrobial Agents: Molecular Docking, DFT, and ADMET Studies

### Supporting Information

| Contain                                                                                                                                                                                                                                                                                                                 |
|-------------------------------------------------------------------------------------------------------------------------------------------------------------------------------------------------------------------------------------------------------------------------------------------------------------------------|
| <b>Fig. S1:</b> <sup>1</sup> H NMR spectrum of final compound 10a                                                                                                                                                                                                                                                       |
| <b>Fig. S2:</b> <sup>1</sup> H NMR spectrum of final compound 10b                                                                                                                                                                                                                                                       |
| <b>Fig. S3:</b> <sup>1</sup> H NMR spectrum of final compound 10c                                                                                                                                                                                                                                                       |
| <b>Fig. S4:</b> <sup>1</sup> H NMR spectrum of final compound 10d                                                                                                                                                                                                                                                       |
| <b>Fig. S5:</b> <sup>1</sup> H NMR spectrum of final compound 10e                                                                                                                                                                                                                                                       |
| <b>Fig. S6:</b> <sup>13</sup> C NMR spectrum of final compound 10a                                                                                                                                                                                                                                                      |
| <b>Fig. S7:</b> <sup>13</sup> C NMR spectrum of final compound 10b                                                                                                                                                                                                                                                      |
| <b>Fig. S8:</b> <sup>13</sup> C NMR spectrum of final compound 10c                                                                                                                                                                                                                                                      |
| <b>Fig. S9:</b> <sup>13</sup> C NMR spectrum of final compound 10d                                                                                                                                                                                                                                                      |
| <b>Fig. S10:</b> <sup>13</sup> C NMR spectrum of final compound 10e                                                                                                                                                                                                                                                     |
| <b>Fig. S11:</b> HR-MS spectrum of final compound 10a                                                                                                                                                                                                                                                                   |
| <b>Fig. S12:</b> HR-MS spectrum of final compound 10b                                                                                                                                                                                                                                                                   |
| <b>Fig. S13:</b> HR-MS spectrum of final compound 10c                                                                                                                                                                                                                                                                   |
| <b>Fig. S14:</b> HR-MS spectrum of final compound 10d                                                                                                                                                                                                                                                                   |
| <b>Fig. S15:</b> HR-MS spectrum of final compound 10e                                                                                                                                                                                                                                                                   |
| <b>Fig. S16:</b> IR spectrum of final compound 10a                                                                                                                                                                                                                                                                      |
| <b>Fig. S17:</b> IR spectrum of final compound 10b                                                                                                                                                                                                                                                                      |
| <b>Fig. S18:</b> IR spectrum of final compound 10c                                                                                                                                                                                                                                                                      |
| <b>Fig. S19:</b> IR spectrum of final compound 10d                                                                                                                                                                                                                                                                      |
| <b>Fig. S20:</b> IR spectrum of final compound 10e                                                                                                                                                                                                                                                                      |
| <b>Table S1:</b> Molecular docking scores (kcal/mol), binding poses, hydrophobic/polar interactions, hydrogen-bond interactions, and charged/glycine backbone contacts of compounds 10a–e and reference drug Novobiocin against <i>Staphylococcus aureus</i> DNA gyrase (PDB: 2XCT).                                    |
| <b>Table S2:</b> Molecular docking scores (kcal/mol), binding poses, hydrophobic/polar interactions, hydrogen-bond interactions, and charged/glycine backbone contacts of compounds 10a–e and reference drug Novobiocin against <i>Escherichia coli</i> GyrB24 (PDB: 7P2M).                                             |
| <b>Table S3:</b> In vitro antimicrobial activity (MIC, µg/mL) of compounds 10a–e against bacterial strains ( <i>S. aureus</i> , <i>S. pyogenes</i> , <i>E. coli</i> , <i>P. aeruginosa</i> ) and fungal strains ( <i>C. albicans</i> , <i>A. niger</i> ); chloramphenicol and griseofulvin used as reference standards. |

Fig. S1: <sup>1</sup>H NMR spectrum of final compound 10a

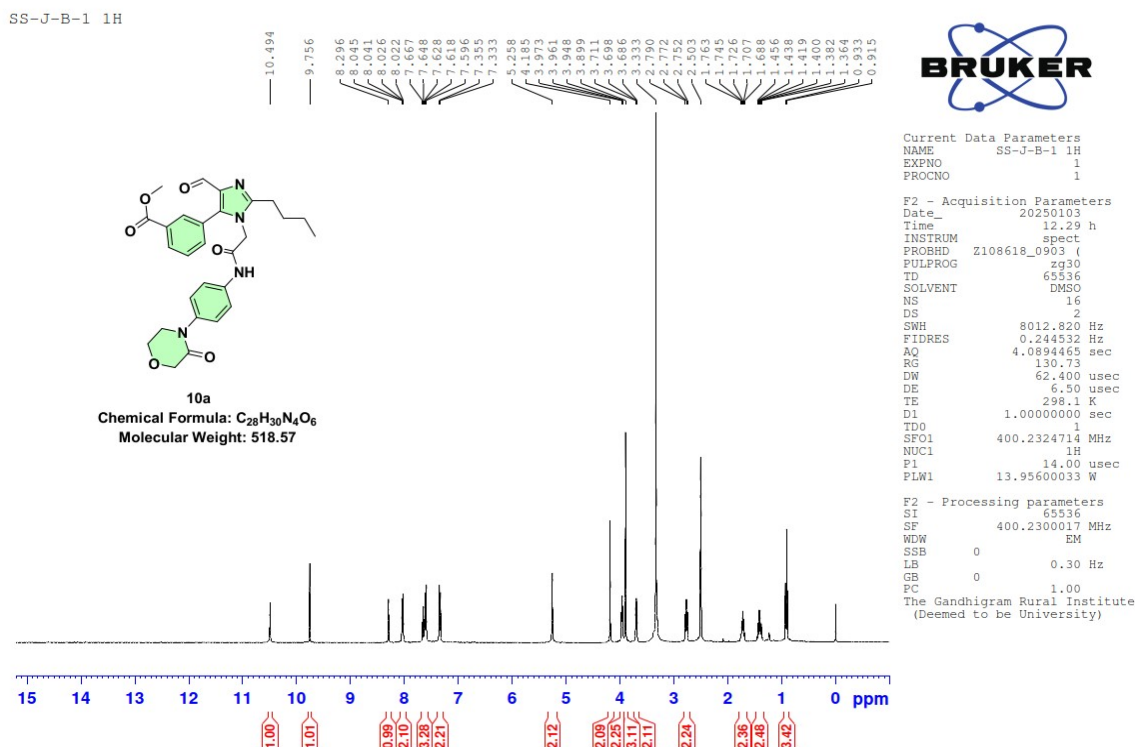

Fig. S2: <sup>1</sup>H NMR spectrum of final compound 10b

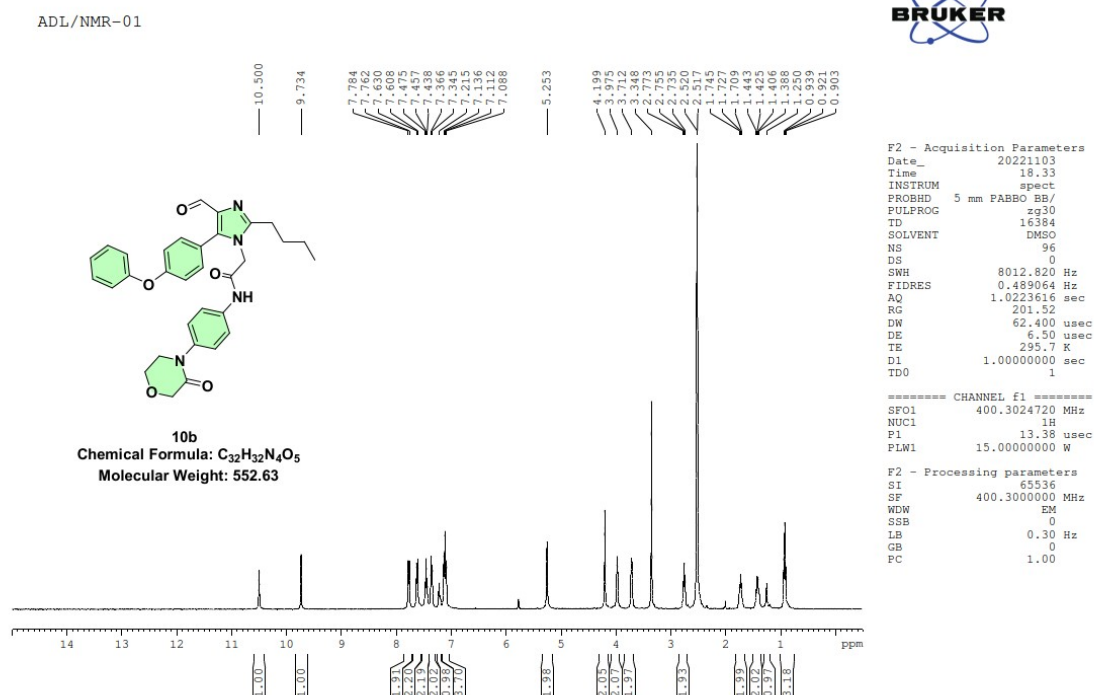

Fig. S3: <sup>1</sup>H NMR spectrum of final compound 10c

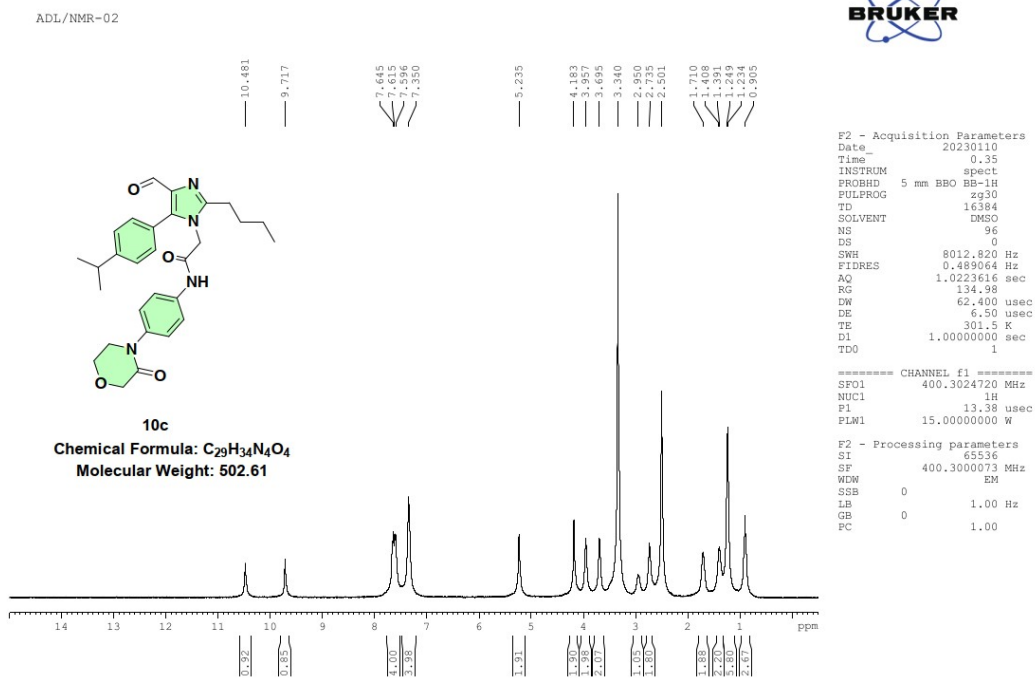

Fig. S4: <sup>1</sup>H NMR spectrum of final compound 10d

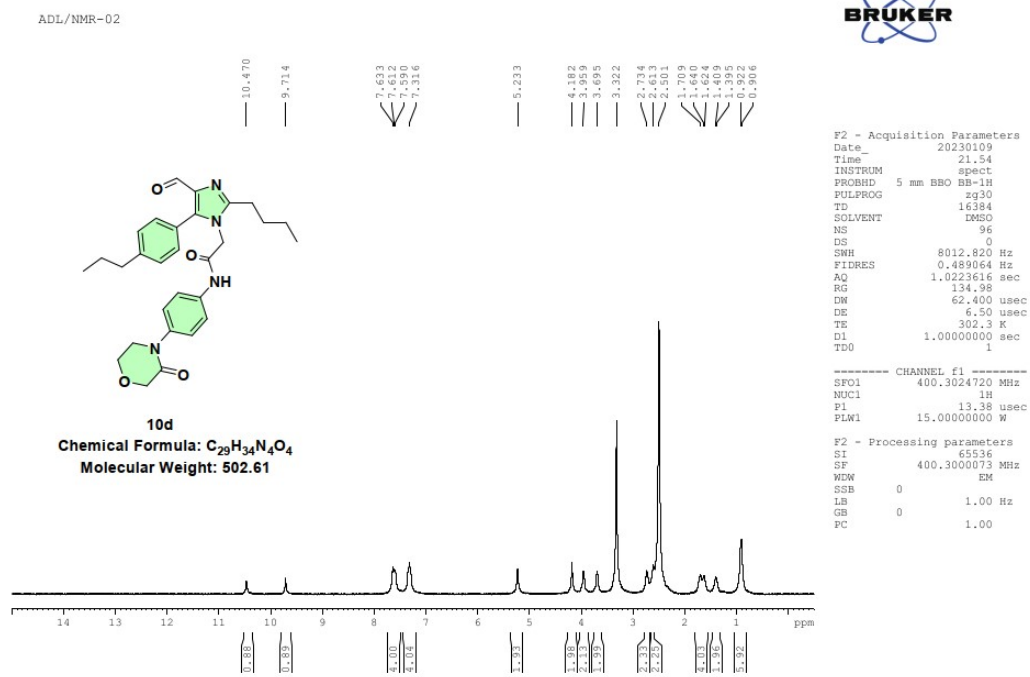

Fig. S5: <sup>1</sup>H NMR spectrum of final compound 10e

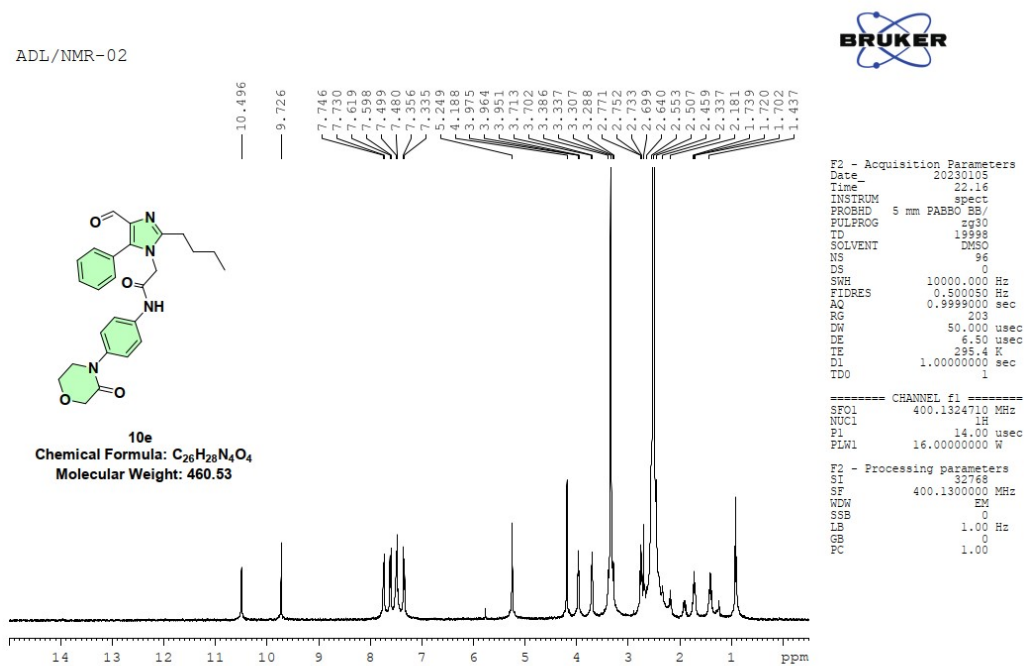

Fig. S6: <sup>13</sup>C NMR spectrum of final compound 10a

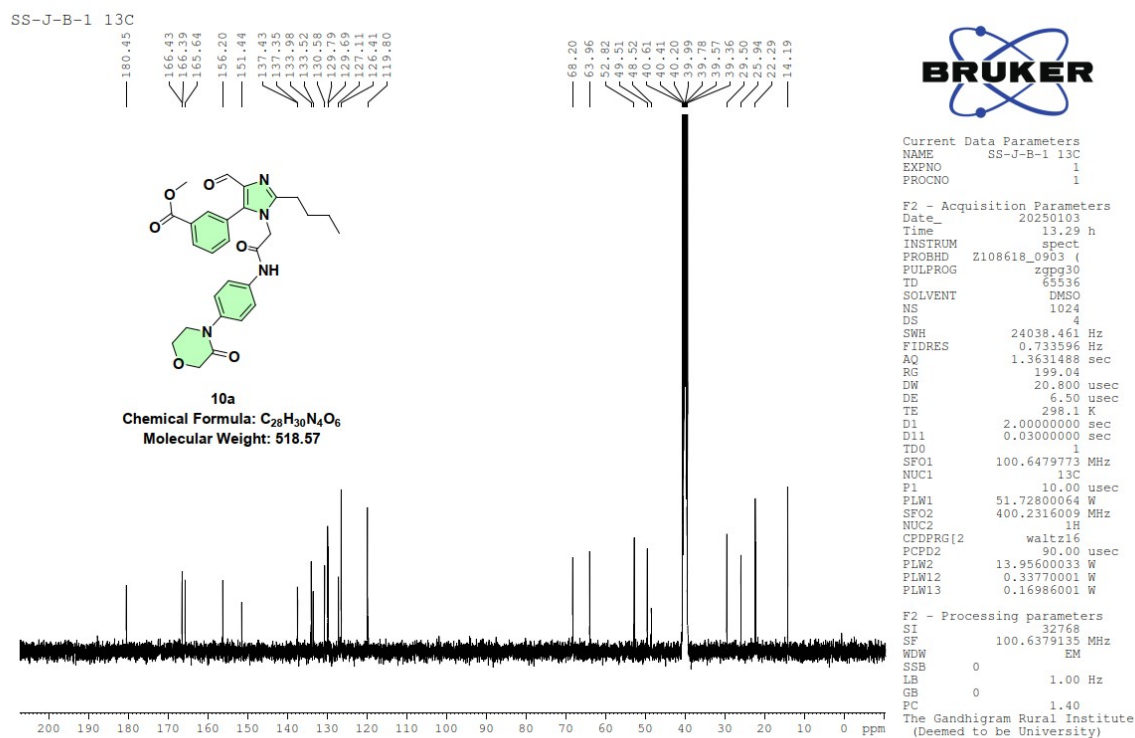

Fig. S7: <sup>13</sup>H NMR spectrum of final compound 10b

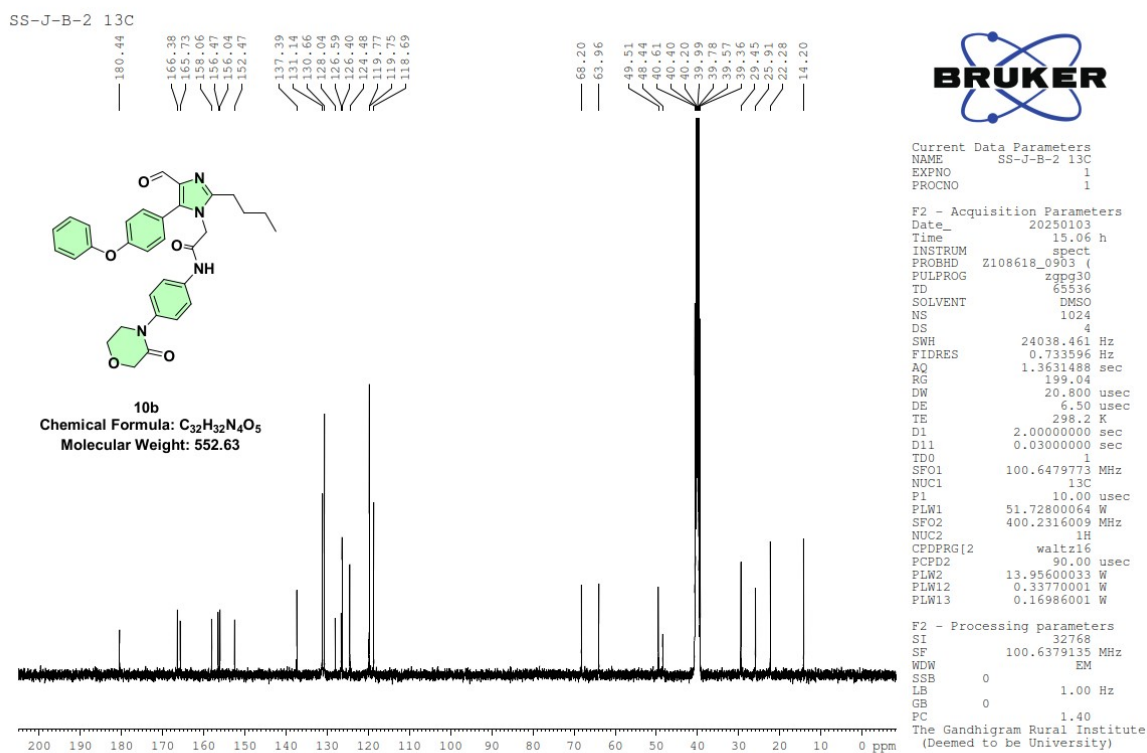

Fig. S8: <sup>13</sup>H NMR spectrum of final compound 10c

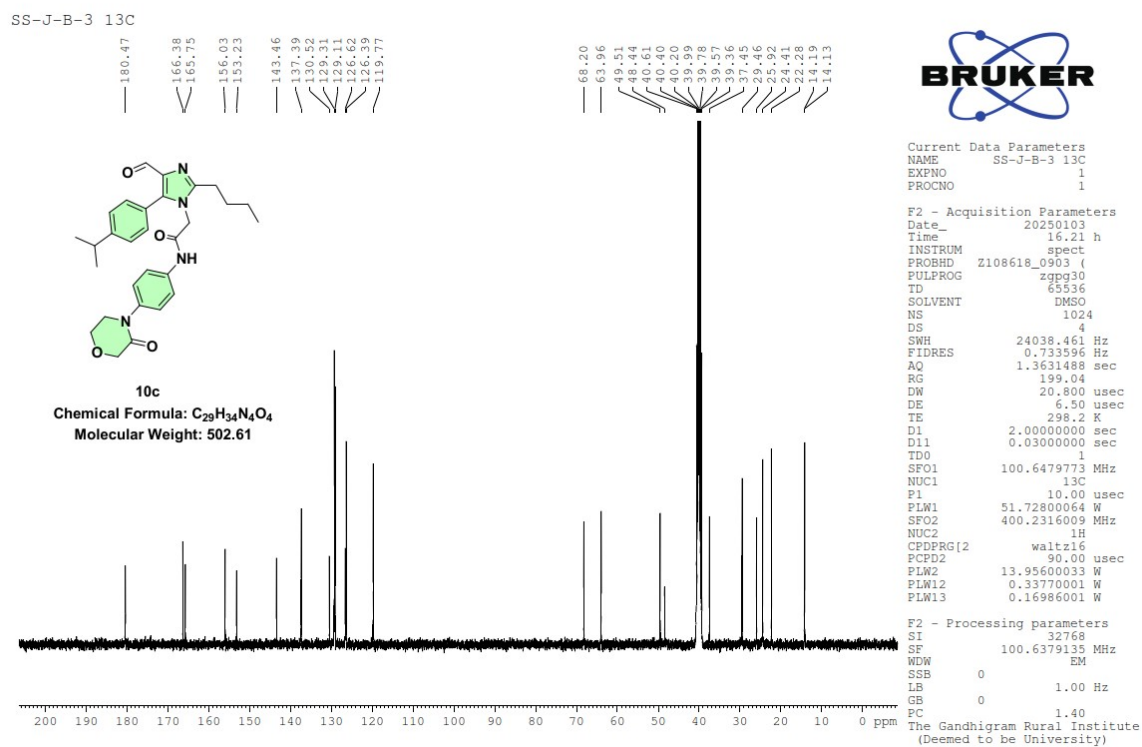

Fig. S9: <sup>13</sup>H NMR spectrum of final compound 10d

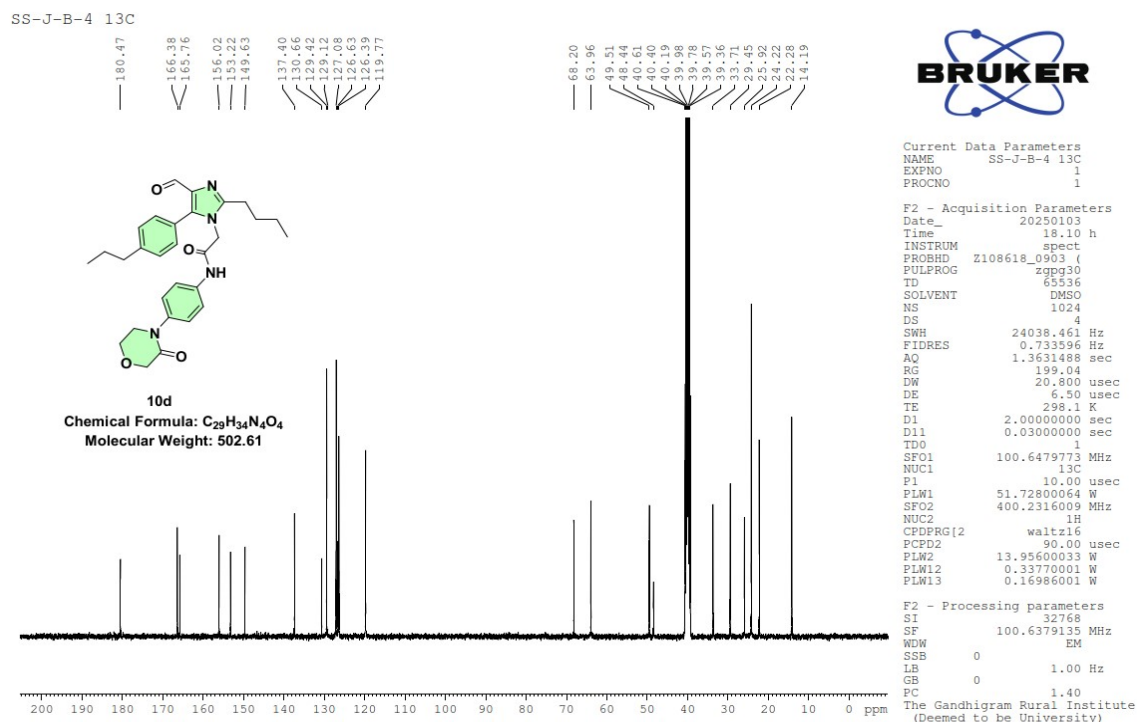

Fig. S10: <sup>13</sup>H NMR spectrum of final compound 10e

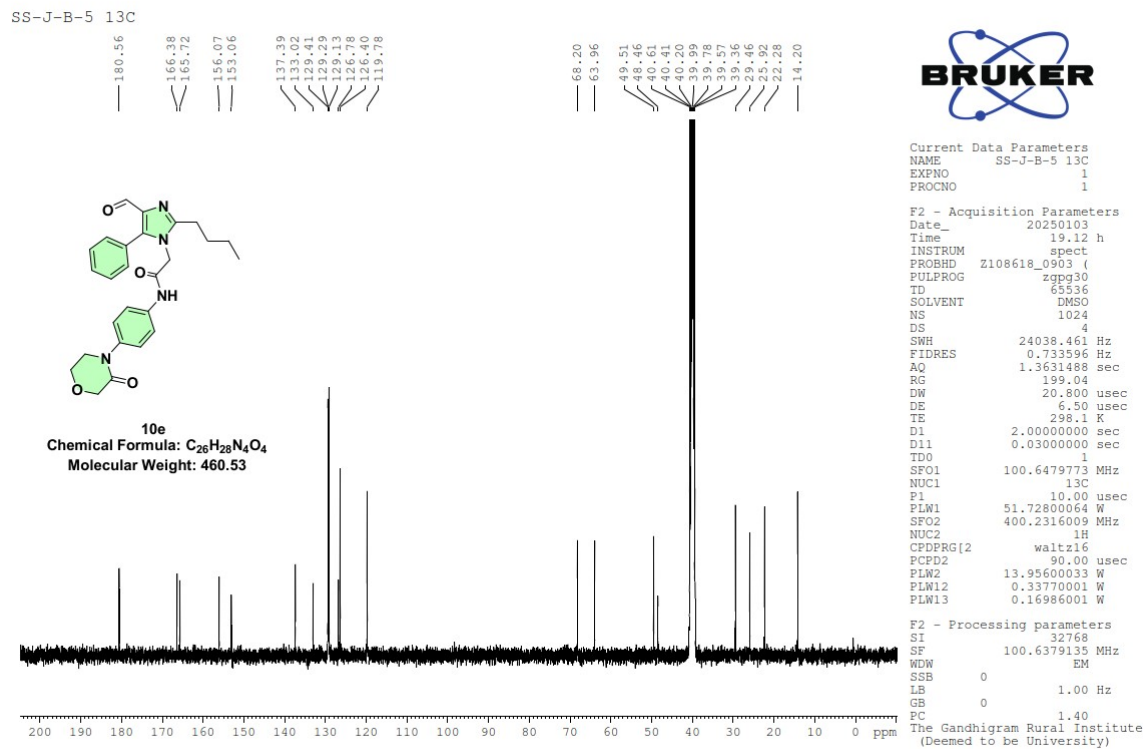

Fig. S11: HR-MS spectrum of final compound 10a

Sample Spectra

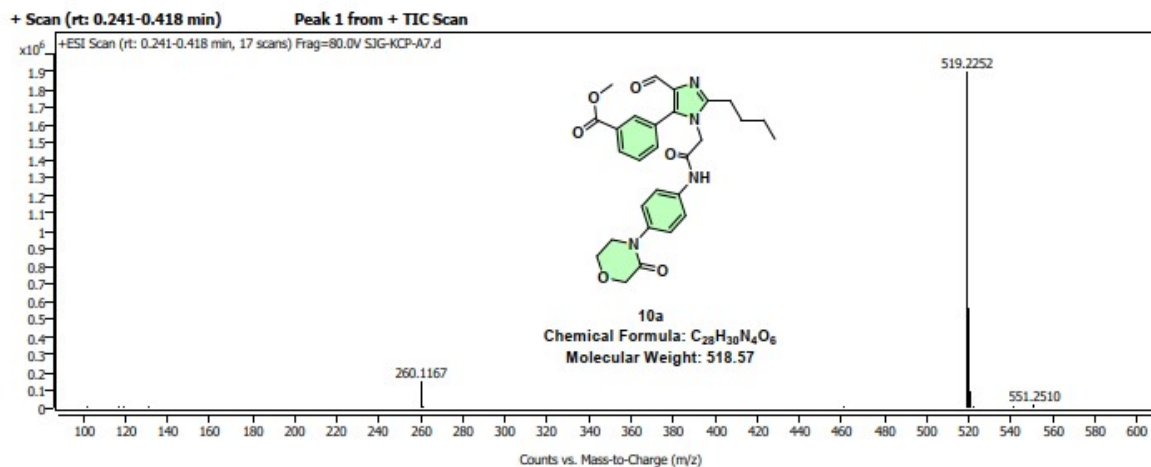

Compound Details

Cpd. 1: C<sub>28</sub>H<sub>30</sub>N<sub>4</sub>O<sub>6</sub>

| Formula                                                       | m/z      | Observed M/Z     | Difference Da    | Difference PPM  | Score |
|---------------------------------------------------------------|----------|------------------|------------------|-----------------|-------|
| C <sub>28</sub> H <sub>30</sub> N <sub>4</sub> O <sub>6</sub> | 519.2252 | 519.225167429387 | 1.32387840687898 | 2.5546819103201 | 95.81 |

Compound Spectra (Zoomed)

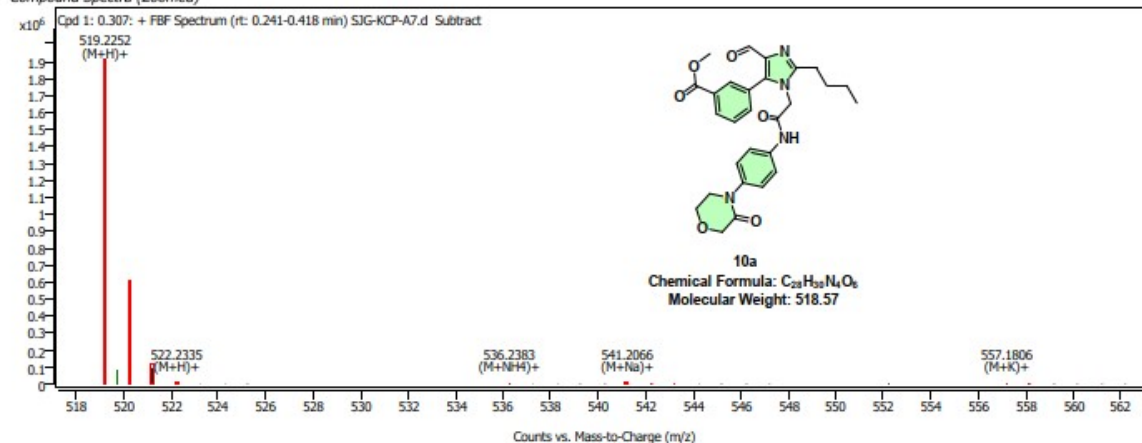

Fig. S12: HR-MS spectrum of final compound 10b

Sample Spectra

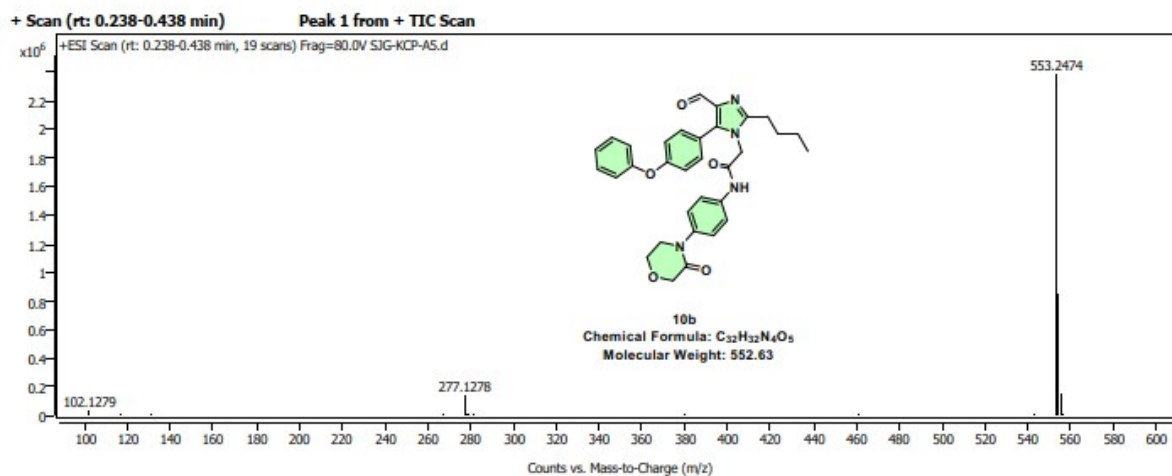

Compound Details

Cpd. 1: C32 H32 N4 O5

| Formula       | m/z      | Observed M/Z     | Difference Da    | Difference PPM   | Score |
|---------------|----------|------------------|------------------|------------------|-------|
| C32 H32 N4 O5 | 575.2287 | 575.228700874384 | 2.74985842179376 | 4.97948720662693 | 89.84 |

Compound Spectra (Zoomed)

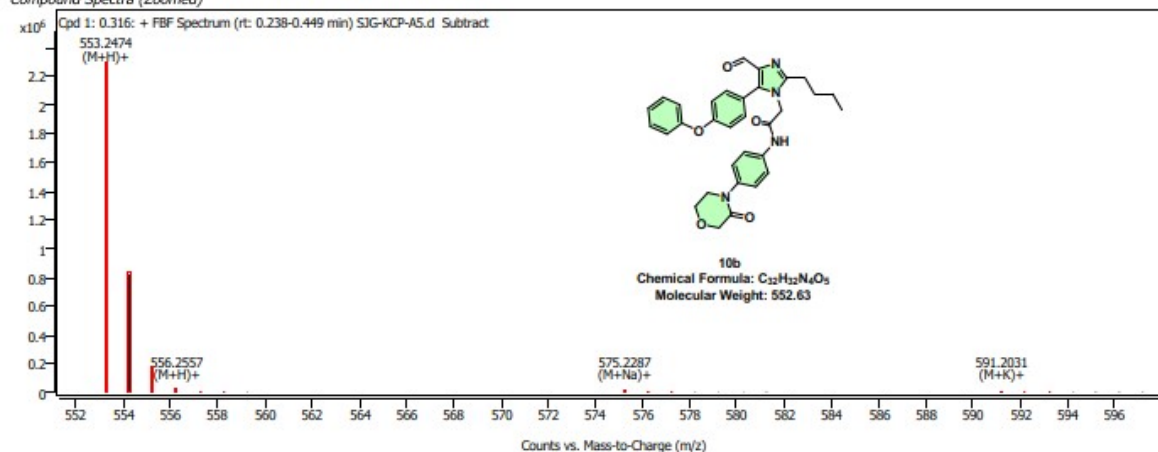

Fig. S13: HR-MS spectrum of final compound 10c

Sample Spectra

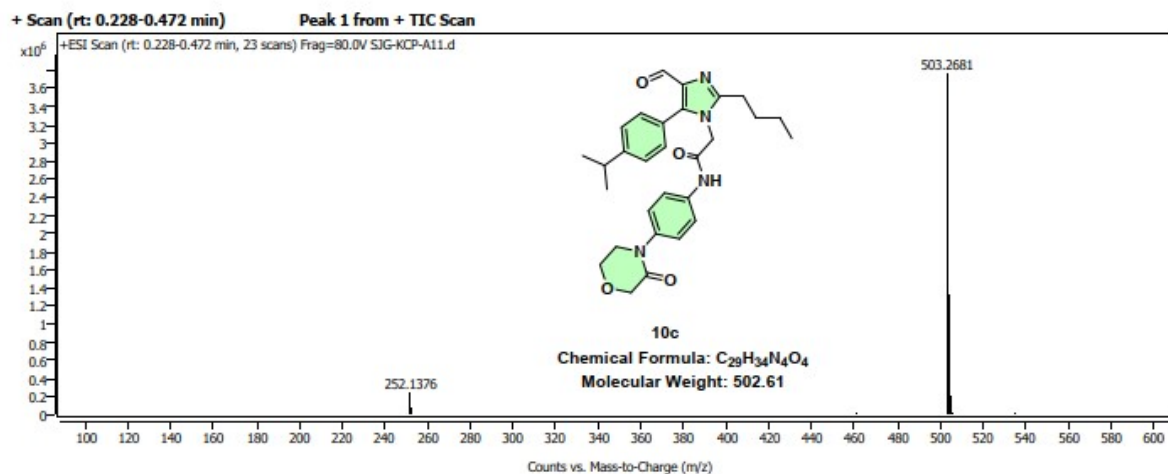

Compound Details

Cpd. 1: C29 H34 N4 O4

| Formula       | m/z      | Observed M/Z     | Difference Da    | Difference PPM   | Score |
|---------------|----------|------------------|------------------|------------------|-------|
| C29 H34 N4 O4 | 525.2483 | 525.248317329607 | 2.52705892347649 | 5.03139600620311 | 89.56 |

Compound Spectra (Zoomed)

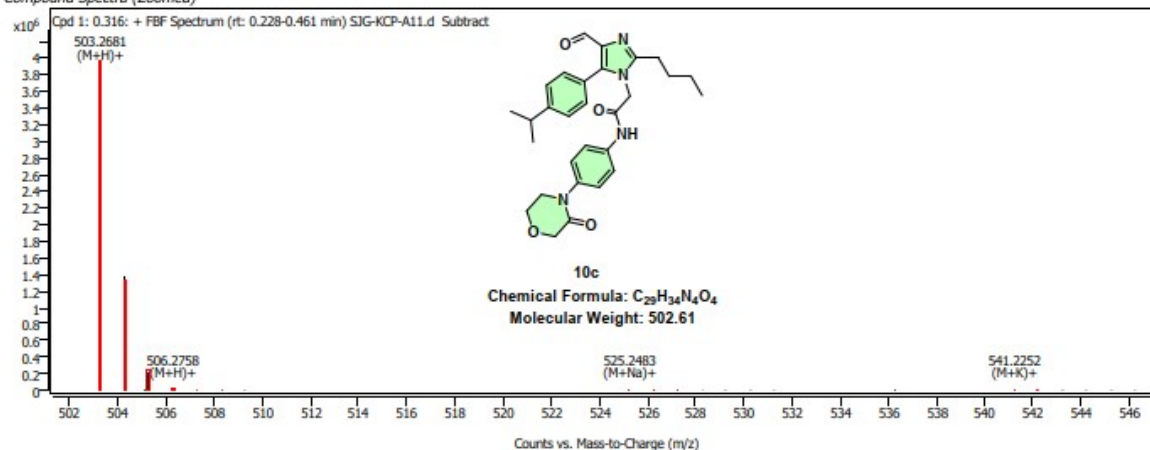

Fig. S14: HR-MS spectrum of final compound 10d

Sample Spectra

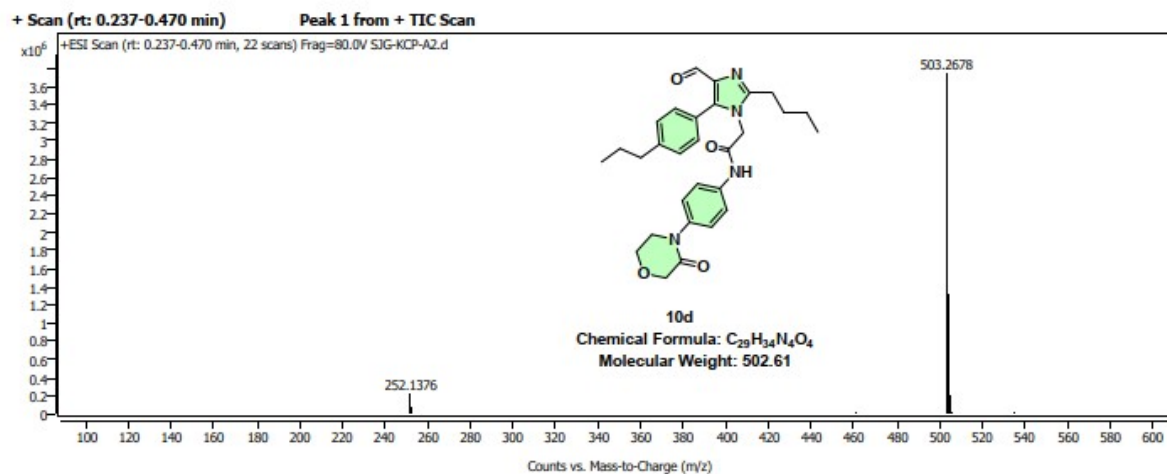

Compound Details

Cpd. 1: C<sub>29</sub>H<sub>34</sub>N<sub>4</sub>O<sub>4</sub>

| Formula                                                       | m/z      | Observed M/Z     | Difference Da    | Difference PPM   | Score |
|---------------------------------------------------------------|----------|------------------|------------------|------------------|-------|
| C <sub>29</sub> H <sub>34</sub> N <sub>4</sub> O <sub>4</sub> | 525.2486 | 525.248607620822 | 2.31285181791918 | 4.60490782051464 | 94.73 |

Compound Spectra (Zoomed)

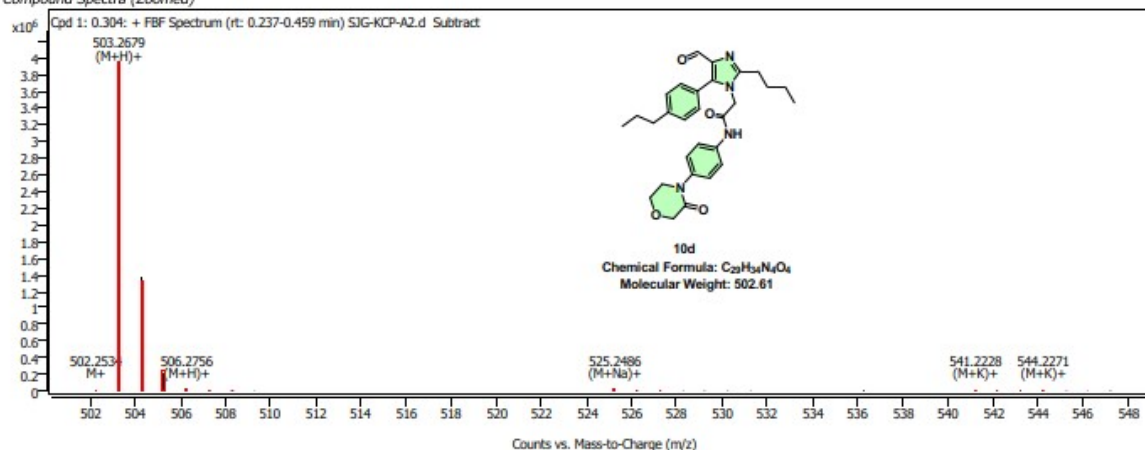

Fig. S15: HR-MS spectrum of final compound 10e

Sample Spectra

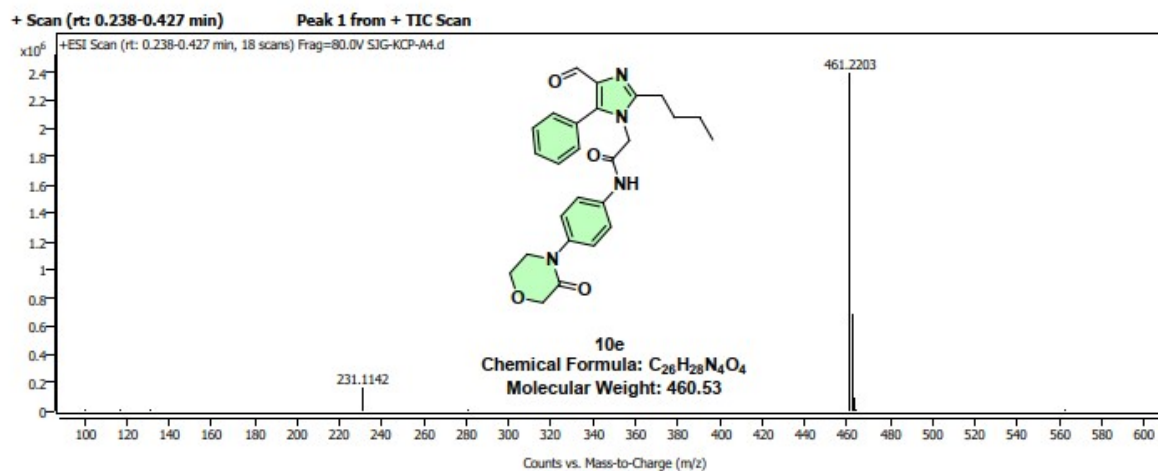

Compound Details

Cpd. 1: C<sub>26</sub>H<sub>28</sub>N<sub>4</sub>O<sub>4</sub>

| Formula                                                       | m/z      | Observed M/Z     | Difference Da    | Difference PPM  | Score |
|---------------------------------------------------------------|----------|------------------|------------------|-----------------|-------|
| C <sub>26</sub> H <sub>28</sub> N <sub>4</sub> O <sub>4</sub> | 461.2203 | 461.220330970966 | 1.94796542376707 | 4.2327653820119 | 91.83 |

Compound Spectra (Zoomed)

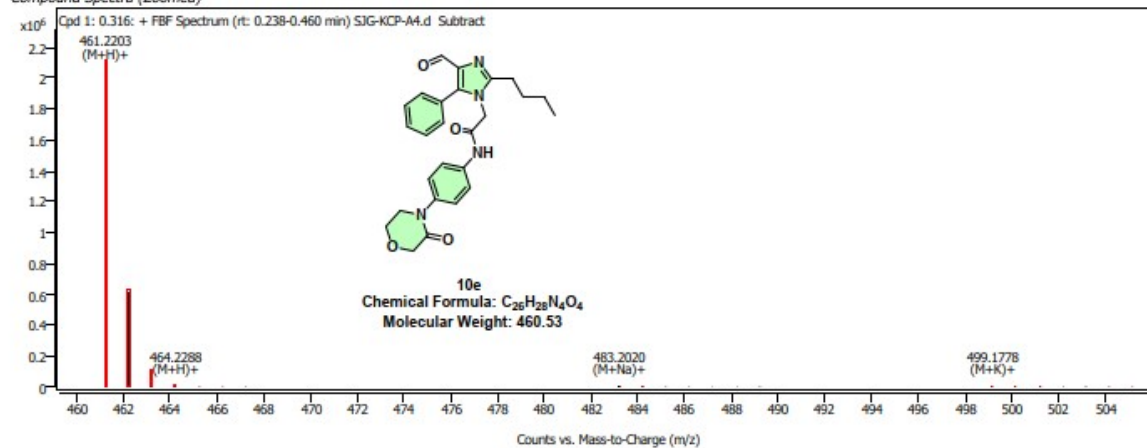

**Fig. S16: IR spectrum of final compound 10a**

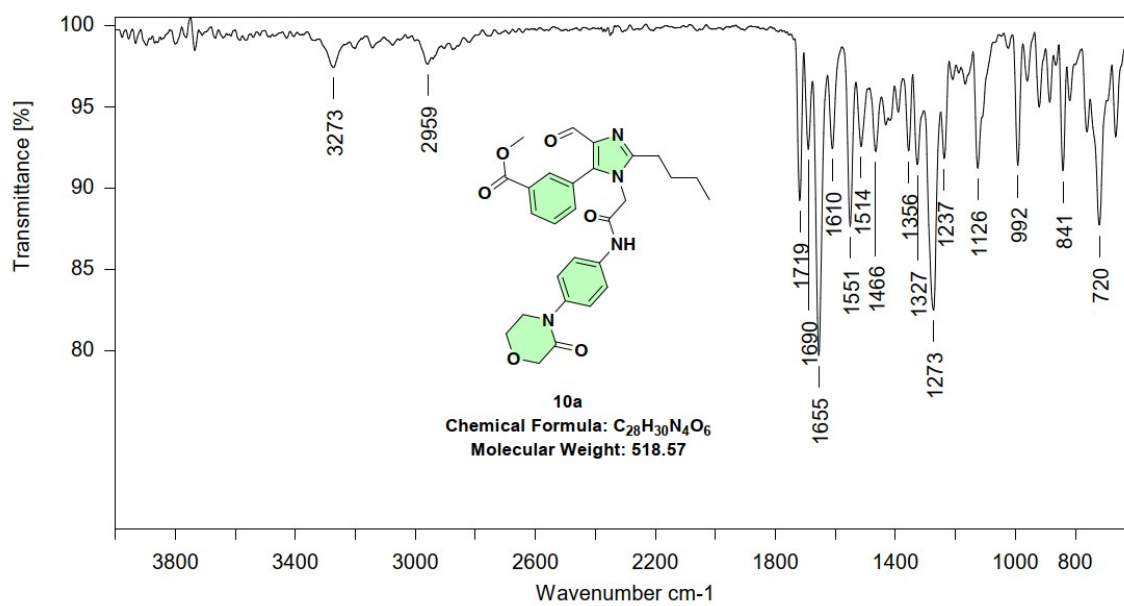

**Fig. S17: IR spectrum of final compound 10b**

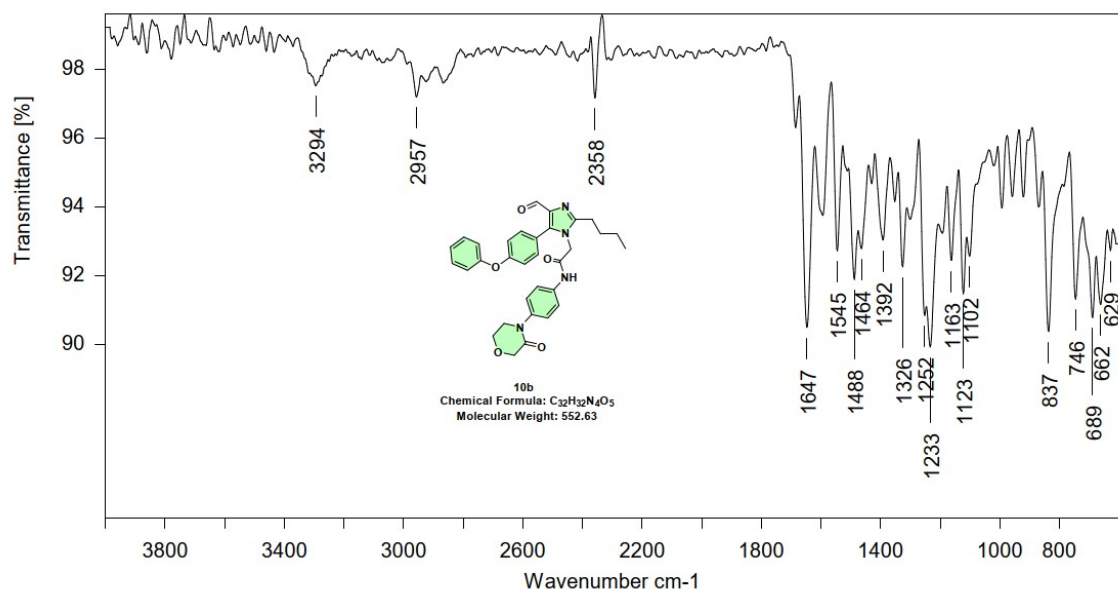

**Fig. S18: IR spectrum of final compound 10c**

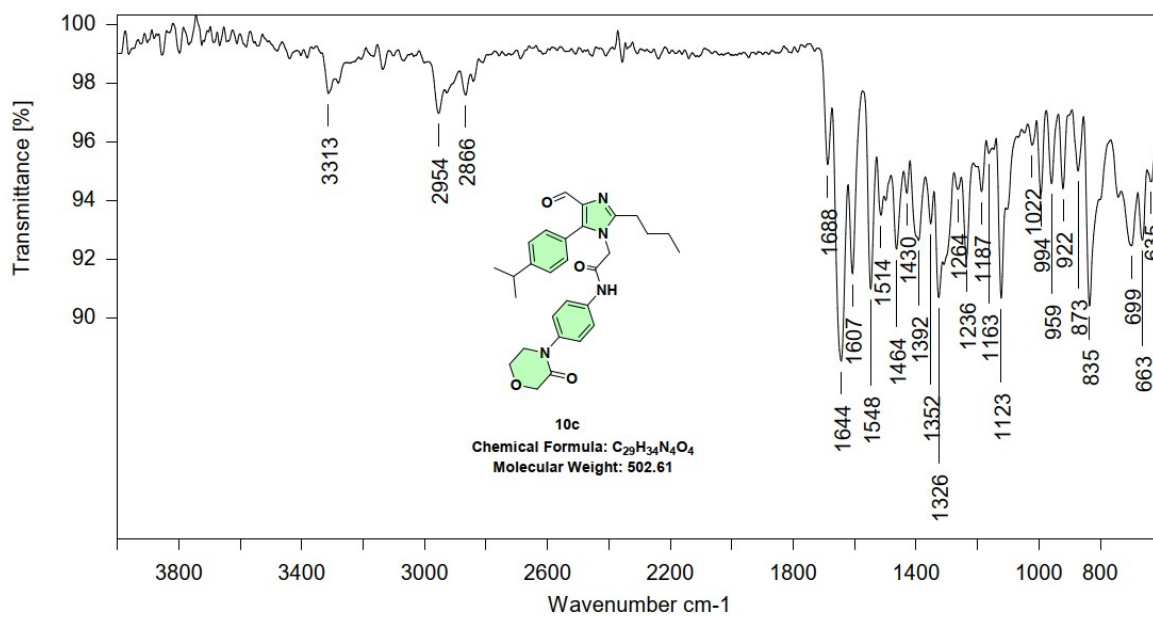

**Fig. S19: IR spectrum of final compound 10d**

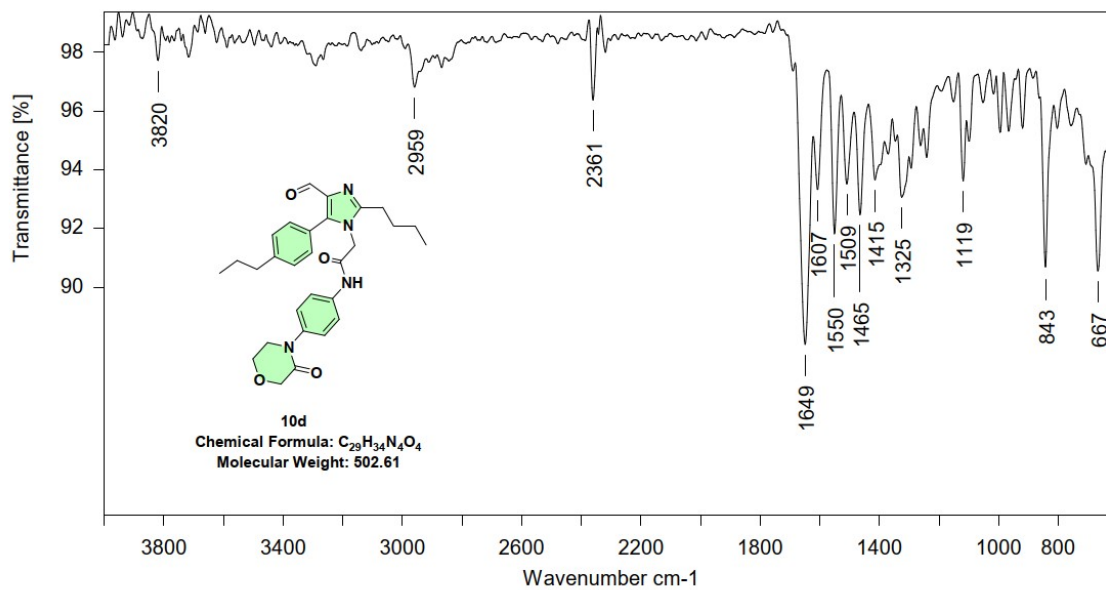

**Fig. S20: IR spectrum of final compound 10e**

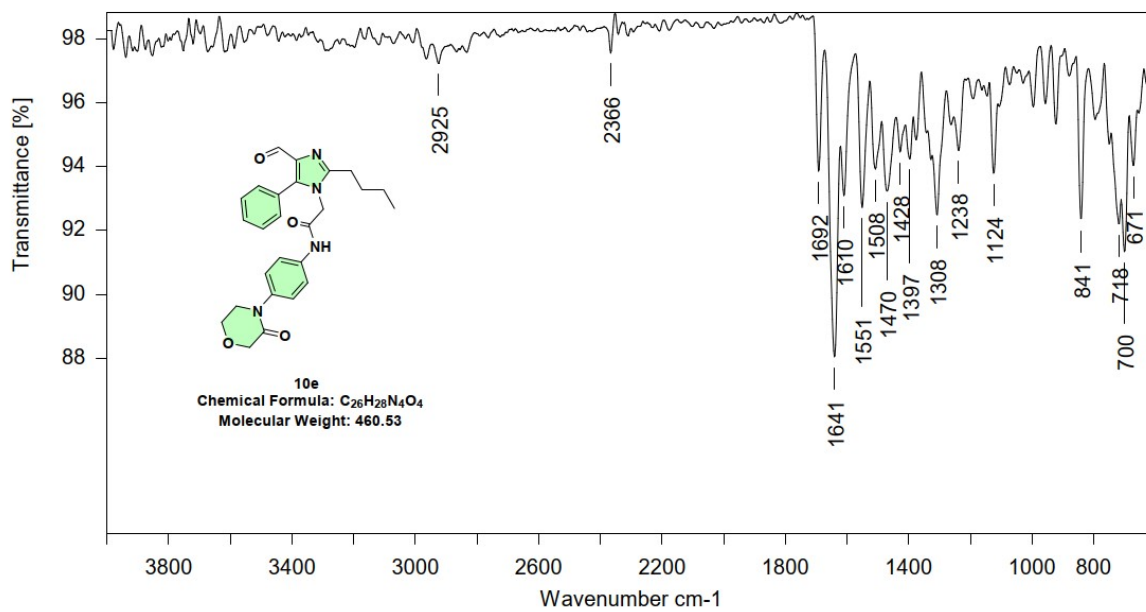

**Table S1. Molecular docking scores (kcal/mol), binding poses, hydrophobic/polar interactions, hydrogen-bond interactions, and charged/glycine backbone contacts of compounds 10a–e and reference drug Novobiocin against *Staphylococcus aureus* DNA gyrase (PDB: 2XCT).**

| Staphylococcus aureus DNA gyrase (2XCT) |                          |               |                                                                                                                                        |                                                                                   |                                                                                                                                          |
|-----------------------------------------|--------------------------|---------------|----------------------------------------------------------------------------------------------------------------------------------------|-----------------------------------------------------------------------------------|------------------------------------------------------------------------------------------------------------------------------------------|
| Compound Code                           | Docking Score (kcal/mol) | Docking Image | Hydrophobic / Polar Interactions                                                                                                       | H-bond Interactions                                                               | Others (Charged / GLY)                                                                                                                   |
| 10a                                     | -5.308                   |               | TRP 592, LEU 1298, VAL 1302, MET 1113, ILE 1274, THR 1296, SER 1297, SER 449, SER 445, SER 1112                                        | LYS 1270 (backbone), ARG 1299 (backbone), ARG 447 (sidechain), SER 445 (backbone) | ARG 1299, ARG 447, LYS 1270 (charged+); ASP 1294, ASP 448, ASP 1114 (charged-); GLY 1301, GLY 446                                        |
| 10b                                     | -5.842                   |               | TRP 592, LEU 1298, VAL 1302, MET 1113, ALA 588, ALA 1271, PHE 1097, THR 1296, SER 1297, SER 449, SER 445, SER 1112                     | ARG 447 (sidechain)                                                               | ARG 1299, ARG 447, LYS 1270 (charged+); ASP 1294, ASP 589, ASP 448, ASP 1114 (charged-); GLY 1301, GLY 446                               |
| 10c                                     | -6.533                   |               | TRP 592, LEU 1298, VAL 1302, MET 1113, ALA 588, PHE 1097, PHE 1110, ALA 1094, THR 1296, SER 1297, SER 445, SER 1112, ASN 587, ASN 1109 | LYS 1270 (backbone), PHE 1110 (sidechain)                                         | ARG 1299, ARG 447, LYS 1270 (charged+); ASP 1294, ASP 589, ASP 448, ASP 1114, ASP 1116 (charged-); GLY 1301, GLY 446, GLY 1111, GLY 1108 |

|                          |                |                                                                                     |                                                                                                                                                                                                                                    |                                                                                         |                                                                                                                                                                         |
|--------------------------|----------------|-------------------------------------------------------------------------------------|------------------------------------------------------------------------------------------------------------------------------------------------------------------------------------------------------------------------------------|-----------------------------------------------------------------------------------------|-------------------------------------------------------------------------------------------------------------------------------------------------------------------------|
| <p><b>10d</b></p>        | <p>−5.712</p>  | 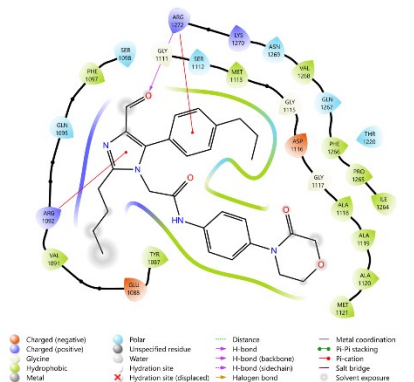   | <p>PHE 1097,<br/>VAL 1091,<br/>MET 1113,<br/>TYR 1087,<br/>PHE 1266,<br/>ILE 1264,<br/>ALA 1118,<br/>ALA 1119,<br/>ALA 1120,<br/>MET 1121,<br/>VAL 1268,<br/>PRO 1265,<br/>SER 1098,<br/>SER 1112,<br/>GLN 1095,<br/>GLN 1267,</p> | <p>ARG 1272<br/>(backbone);<br/>Pi-cation:<br/>ARG 1092</p>                             | <p>ARG 1272,<br/>ARG 1092,<br/>LYS 1270<br/>(charged+)<br/>; ASP<br/>1116, GLU<br/>1088<br/>(charged−)<br/>; GLY<br/>1111, GLY<br/>1115, GLY<br/>1117</p>               |
| <p><b>10e</b></p>        | <p>−5.658</p>  |   | <p>VAL 1268,<br/>MET 1113,<br/>ILE 1264,<br/>PHE 1097,<br/>VAL 1091,<br/>TYR 1087,<br/>ALA 1118,<br/>ALA 1119,<br/>ALA 1120,<br/>SER 1098,<br/>SER 1112,<br/>GLN 1267,<br/>ASN 1269,<br/>THR 1220</p>                              | <p>ASN 1269<br/>(backbone),<br/>ARG 1272<br/>(sidechain)</p>                            | <p>ARG 1272,<br/>ARG 1092,<br/>LYS 1270<br/>(charged+)<br/>; ASP<br/>1114, ASP<br/>1116, GLU<br/>1088<br/>(charged−)<br/>; GLY<br/>1111, GLY<br/>1115, GLY<br/>1117</p> |
| <p><b>Novobiocin</b></p> | <p>−5.7223</p> |  | <p>ALA 509,<br/>TYR 580,<br/>ALA 640,<br/>LEU 642,<br/>PHE 644,<br/>ALA 1032,<br/>VAL 1031,<br/>ILE 1147,<br/>TYR 1150,<br/>VAL 1159</p>                                                                                           | <p>ASN 641<br/>backbone),<br/>ARG 1039<br/>(backbone),<br/>ASP 1145<br/>(backbone),</p> | <p>LYS 581,<br/>ARG 1039,<br/>ARG 1047,<br/>(charged+)<br/>;<br/>ASH 510,<br/>ASP 643,<br/>ASP 1037,<br/>ASP 1151,<br/>ASP 1145,<br/>(charged−)<br/>;</p>               |

**Table S2. Molecular docking scores (kcal/mol), binding poses, hydrophobic/polar interactions, hydrogen-bond interactions, and charged/glycine backbone contacts of compounds 10a–e and reference drug Novobiocin against *Escherichia coli* GyrB24 (PDB: 7P2M).**

| Escherichia coli DNA gyrase subunit B (GyrB24) (7P2M) |                          |                                                                                      |                                                                                                                               |                     |                                                                                         |
|-------------------------------------------------------|--------------------------|--------------------------------------------------------------------------------------|-------------------------------------------------------------------------------------------------------------------------------|---------------------|-----------------------------------------------------------------------------------------|
| Compound Code                                         | Docking Score (kcal/mol) | Docking Image                                                                        | Hydrophobic Interactions/ Polar Interactions                                                                                  | H-bond Interactions | Others (Charged / GLY)                                                                  |
| 10a                                                   | -4.582                   | 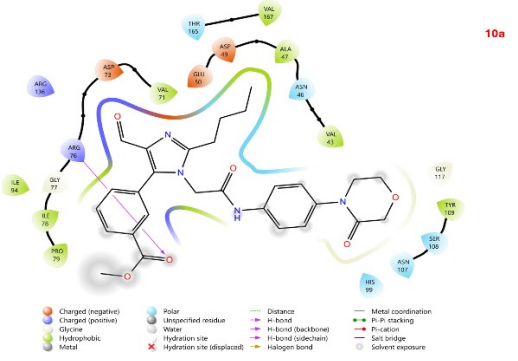  | VAL 167, ALA 47, VAL 43, ILE 94, ILE 78, PRO 79, TYR 109, THR 165, ASN 46, HIS 99, SER 108, ASN 107                           | ARG 76 (backbone)   | ARG 136, ARG 76 (charged+); ASP 49, ASP 73, GLU 50 (charged-); GLY 77, GLY 117          |
| 10b                                                   | -4.918                   |  | VAL 167, VAL 43, ALA 47, VAL 71, ILE 78, PRO 79, ILE 94, ALA 90, TYR 109, VAL 120, THR 165, ASN 46, HIS 99, SER 108, ASN 107  | ARG 76 (backbone)   | ARG 136, ARG 76 (charged+); ASP 49, ASP 73, GLU 50 (charged-); GLY 77, GLY 117, GLY 119 |
| 10c                                                   | -5.821                   |  | VAL 43, ALA 47, VAL 71, ILE 78, PRO 79, ILE 94, MET 166, VAL 167, VAL 120, TYR 109, ASN 46, THR 165, HIS 99, SER 108, ASN 107 | ARG 76 (backbone)   | ARG 76 (charged+); ASP 49, ASP 73, GLU 50, ASP 106 (charged-); GLY 75, GLY 77, GLY 117  |

|                          |               |                                                                                      |                                                                                                                                                                                     |                                                                                        |                                                                                                                         |
|--------------------------|---------------|--------------------------------------------------------------------------------------|-------------------------------------------------------------------------------------------------------------------------------------------------------------------------------------|----------------------------------------------------------------------------------------|-------------------------------------------------------------------------------------------------------------------------|
| <p><b>10d</b></p>        | <p>-5.546</p> | 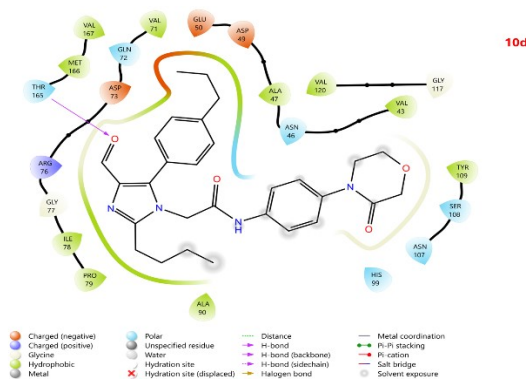   | <p>VAL 71,<br/>VAL 43,<br/>ALA 47,<br/>MET 166,<br/>VAL 167,<br/>ILE 78, PRO<br/>79, ALA 90,<br/>TYR 109,<br/>THR 165,<br/>ASN 46,<br/>GLN 72, HIS<br/>99, SER 108,<br/>ASN 107</p> | <p>THR 165<br/>(backbone)</p>                                                          | <p>ARG 76<br/>(charged+)<br/>; ASP 49,<br/>ASP 73,<br/>GLU 50<br/>(charged-)<br/>; GLY 77,<br/>GLY 117</p>              |
| <p><b>10e</b></p>        | <p>-5.382</p> |   | <p>VAL 167,<br/>VAL 43,<br/>ALA 47,<br/>VAL 120,<br/>ILE 78, PRO<br/>79, ILE 94,<br/>TYR 109,<br/>THR 165,<br/>ASN 46, HIS<br/>99, SER 108,<br/>ASN 107</p>                         | <p>ARG 76<br/>(backbone)</p>                                                           | <p>ARG 76<br/>(charged+)<br/>; ASP 49,<br/>ASP 73,<br/>GLU 50,<br/>ASP 106<br/>(charged-)<br/>; GLY 75,<br/>GLY 117</p> |
| <p><b>Novobiocin</b></p> | <p>-5.192</p> |  | <p>VAL 43,<br/>ALA 47,<br/>VAL 71, ILE<br/>78, PRO 79,<br/>ALA 100,<br/>VAL 120,<br/>VAL 167,</p>                                                                                   | <p>ASN 46<br/>(sidechain),<br/>ASP 73<br/>(side chain)<br/>ASP 106<br/>(sidechain)</p> | <p>ARG 76,<br/>LYS 103<br/>(charged+)<br/>; ASP 49,<br/>GLU 50,<br/>ASP 73,<br/>(charged-)</p>                          |

## **In Vitro Antimicrobial Activity**

### **Microorganisms and Culture Conditions**

Antimicrobial activity of compounds 10a–e was evaluated against four bacterial strains, *Staphylococcus aureus* MTCC 96, *Streptococcus pyogenes* MTCC 442, *Escherichia coli* MTCC 443, and *Pseudomonas aeruginosa* MTCC 1688 and two fungal strains, *Candida albicans* MTCC 227 and *Aspergillus niger* MTCC 282. All microbial strains were procured from the Microbial Type Culture Collection (MTCC), IMTECH, Chandigarh, India [1]. Bacterial strains were maintained on nutrient agar (NA) and fungal strains on Sabouraud dextrose agar (SDA) at appropriate temperatures (37 °C for bacteria; 28 °C for fungi) [3].

### **Determination of Minimum Inhibitory Concentration (MIC)**

The minimum inhibitory concentration (MIC) of all synthesised compounds was determined by the broth microdilution method following the Clinical and Laboratory Standards Institute (CLSI) guidelines [1,2]. Stock solutions of test compounds were prepared in dimethyl sulfoxide (DMSO) at a concentration of 1000 µg/mL and subsequently diluted in Mueller–Hinton broth (MHB) for bacteria and Sabouraud dextrose broth (SDB) for fungi to achieve the required concentration range (3.90–250 µg/mL) [3]. Serial two-fold dilutions were performed in 96-well microtitre plates [3]. Each well was inoculated with a standardised microbial suspension (approximately  $5 \times 10^5$  CFU/mL for bacteria;  $0.5 \times 10^3$  to  $2.5 \times 10^3$  CFU/mL for fungi) and incubated at 37 °C for 24 h (bacteria) or 48–72 h at 28 °C (fungi) [1,2]. Chloramphenicol and griseofulvin were used as reference standards for antibacterial and antifungal activity, respectively [3]. DMSO at the highest concentration used served as the negative control. The MIC was defined as the lowest concentration of compound that visually inhibited microbial growth [1,2,3]. All assays were performed in triplicate, and results are expressed as mean  $\pm$  standard deviation (SD).

### **References**

[1] Clinical and Laboratory Standards Institute (CLSI). (2022). Methods for dilution antimicrobial susceptibility tests for bacteria that grow aerobically (12th ed.; CLSI standard M07). CLSI.

[2] Clinical and Laboratory Standards Institute (CLSI). (2022). Reference method for broth dilution antifungal susceptibility testing of yeasts (4th ed.; CLSI standard M27). CLSI.

[3] Balouiri, M., Sadiki, M., & Ibsouda, S. K. (2016). Methods for in vitro evaluating antimicrobial activity: A review. *Journal of Pharmaceutical Analysis*, 6(2), 71–79. <https://doi.org/10.1016/j.jpha.2015.11.005>

**Table S3. In vitro antimicrobial activity (MIC,  $\mu\text{g/mL}$ ) of compounds 10a–e against bacterial strains (*S. aureus*, *S. pyogenes*, *E. coli*, *P. aeruginosa*) and fungal strains (*C. albicans*, *A. niger*); chloramphenicol and griseofulvin used as reference standards.**

| Compound               | <i>S. aureus</i><br>MTCC 96<br>( $\mu\text{g/mL}$ ) | <i>S. pyogenes</i><br>MTCC 442<br>( $\mu\text{g/mL}$ ) | <i>E. coli</i><br>MTCC 443<br>( $\mu\text{g/mL}$ ) | <i>P. aeruginosa</i><br>MTCC 1688<br>( $\mu\text{g/mL}$ ) | <i>C. albicans</i><br>MTCC 227<br>( $\mu\text{g/mL}$ ) | <i>A. niger</i><br>MTCC 282<br>( $\mu\text{g/mL}$ ) |
|------------------------|-----------------------------------------------------|--------------------------------------------------------|----------------------------------------------------|-----------------------------------------------------------|--------------------------------------------------------|-----------------------------------------------------|
| <b>10a</b>             | 15.62 $\pm$ 0.3                                     | 62.5 $\pm$ 0.5                                         | 31.25 $\pm$ 0.6                                    | 7.82 $\pm$ 0.4                                            | 31.25 $\pm$ 0.1                                        | 62.5 $\pm$ 0.3                                      |
| <b>10b</b>             | 31.25 $\pm$ 0.4                                     | 15.62 $\pm$ 0.5                                        | 62.5 $\pm$ 0.5                                     | 31.25 $\pm$ 0.4                                           | 62.5 $\pm$ 0.1                                         | 31.25 $\pm$ 0.2                                     |
| <b>10c</b>             | 7.81 $\pm$ 0.2                                      | 7.82 $\pm$ 0.7                                         | 15.62 $\pm$ 0.3                                    | 15.62 $\pm$ 0.3                                           | 15.62 $\pm$ 0.3                                        | 31.25 $\pm$ 0.5                                     |
| <b>10d</b>             | 15.62 $\pm$ 0.6                                     | 15.62 $\pm$ 0.1                                        | 31.25 $\pm$ 0.3                                    | 31.25 $\pm$ 0.5                                           | 62.5 $\pm$ 0.7                                         | 62.5 $\pm$ 0.1                                      |
| <b>10e</b>             | 15.62 $\pm$ 0.8                                     | 31.25 $\pm$ 0.3                                        | 31.25 $\pm$ 0.2                                    | 62.5 $\pm$ 0.5                                            | 62.5 $\pm$ 0.2                                         | 62.5 $\pm$ 0.3                                      |
| <b>Chloramphenicol</b> | 7.8 $\pm$ 0.1                                       | 7.8 $\pm$ 0.1                                          | 7.8 $\pm$ 0.2                                      | 7.8 $\pm$ 0.2                                             | -                                                      | -                                                   |
| <b>Griseofulvin</b>    | -                                                   | -                                                      | -                                                  | -                                                         | 15.62 $\pm$ 0.4                                        | 15.62 $\pm$ 0.2                                     |
